# Supplementary material for: How Does Social Media Influence People to Get Vaccinated? The Elaboration Likelihood Model of a Person’s Attitude and Intention to Get COVID-19 Vaccines
Source: MDPI journal article supplement (doi:10.3390/ijerph19042378), 2022-02-18
Supplement: s1 [file s1]

## Supplementary Material

### Construct Definition and Description

| Construct Name               | Description                                                                                                                                                                                                                                                                                                                                    | Source                                                             |
|------------------------------|------------------------------------------------------------------------------------------------------------------------------------------------------------------------------------------------------------------------------------------------------------------------------------------------------------------------------------------------|--------------------------------------------------------------------|
| Information Completeness     | The extent to which the vaccine information provided is of sufficient depth and breadth. In this study, the information need to contain: <ul style="list-style-type: none"><li>• Working mechanism of vaccine</li><li>• Information on vaccine effectiveness during the past</li><li>• Islamic legal perspective (Malaysian context)</li></ul> | (Elkalmi et al., 2021; Palm et al., 2021; Shulman & Bullock, 2020) |
| Information Accuracy         | The degree to which vaccine information provided is correct, unambiguous, and accurate                                                                                                                                                                                                                                                         | (Elkalmi et al., 2021; Palm et al., 2021; Shulman & Bullock, 2020) |
| Experience Sharing           | The post needs to contain users firsthand experience of getting vaccination. It also needs to include story telling technique in describing the process                                                                                                                                                                                        | (Botsis et al., 2020; Cornwall, 2020)                              |
| Social Pressure              | The post needs to contain message on prosocial responsibility of an individual towards his or her immediate family (e.g., parents, spouses, children)                                                                                                                                                                                          | (Jordan et al., 2020)                                              |
| Perceived Informativeness    | The extent to which the respondents believes that the posts message includes informational contents about the vaccine                                                                                                                                                                                                                          | (Chang et al., 2020; Elhadi et al., 2021)                          |
| Perceived Persuasiveness     | The extent to which the received information can persuade the respondent to believe on the vaccination                                                                                                                                                                                                                                         | (Cesario et al., 2004; Petravić et al., 2021)                      |
| Attitude Towards Vaccination | A respondent “ <i>learned predisposition</i> ” to respond in a consistently favourable or unfavourable manner toward the COVID-19 vaccine in general”                                                                                                                                                                                          | (Cordina et al., 2021; Langford, 2020)                             |
| Intention to Vaccinate       | Respondents think that they intend to get COVID-19 vaccination in the near future                                                                                                                                                                                                                                                              | (Dodd et al., 2021; Langford, 2020; Piltch-Loeb et al., 2021)      |

### Details of Instrument and Sources

| Construct Name               | Items                                                                                                                                                                                                                                                                                                                                                                                                                                                                                                                 | Source                                        |
|------------------------------|-----------------------------------------------------------------------------------------------------------------------------------------------------------------------------------------------------------------------------------------------------------------------------------------------------------------------------------------------------------------------------------------------------------------------------------------------------------------------------------------------------------------------|-----------------------------------------------|
| Perceived Informativeness    | <p>The twitter post content provides timely information about COVID-19 vaccines</p> <p>The twitter post content supplies relevant information about COVID-19 vaccines</p> <p>The twitter post content is a good source of information about COVID-19 vaccines</p> <p>The twitter post content clearly describes about COVID-19 features</p> <p>The twitter post content clearly informs me on how COVID-19 vaccines work</p> <p>The twitter post content provides useful information data about COVID-19 vaccines</p> | (Chang et al., 2020; Elhadi et al., 2021)     |
| Perceived Persuasiveness     | <p>I consider the twitter post content to be convincing</p> <p>I consider the twitter post content to be persuasive</p> <p>I consider the twitter post content to be believable</p> <p>I consider the twitter post content information to be trustworthy</p> <p>I consider the twitter post content information is influential</p>                                                                                                                                                                                    | (Cesario et al., 2004; Petravić et al., 2021) |
| Attitude Towards Vaccination | <p>I felt that the twitter post content influence me to take COVID-19 vaccine</p> <p>I value the twitter post content in informing me the importance of COVID-19 vaccine</p> <p>I am satisfied with the twitter post content information on the importance of COVID-19 vaccine</p>                                                                                                                                                                                                                                    | (Cordina et al., 2021; Langford, 2020)        |

|                        |                                                                                                                                                                                                                                                                                                                 |                                                               |
|------------------------|-----------------------------------------------------------------------------------------------------------------------------------------------------------------------------------------------------------------------------------------------------------------------------------------------------------------|---------------------------------------------------------------|
|                        | The twitter post content helps me on making decision to take COVID-19 vaccine                                                                                                                                                                                                                                   |                                                               |
|                        | The twitter post content positively teaches me on the important of COVID-19 vaccine                                                                                                                                                                                                                             |                                                               |
|                        | The twitter post content improves my trust on COVID-19 vaccine                                                                                                                                                                                                                                                  |                                                               |
|                        | The twitter post content enhance my information on COVID-19 vaccine efficacy                                                                                                                                                                                                                                    |                                                               |
| Intention to Vaccinate | I would consider taking COVID-19 vaccine after reading the twitter post<br>I intend to take COVID-19 vaccine after reading the twitter post<br>I would probably get COVID-19 vaccine after reading the twitter post<br>I am very interested to be vaccinated by COVID-19 vaccine after reading the twitter post | (Dodd et al., 2021; Langford, 2020; Piltch-Loeb et al., 2021) |

## Scenario Design

Abbreviation: - 22 questions, 4 manipulation check question

1. IC = Information Completeness
2. IA = Information Accuracy
3. ES = Experience Sharing
4. SP = Social Pressure

| No | Scenario Type              | Description                                                                                                                                                                                                                                                                                                                                                                                                                                                                                                                                                           |
|----|----------------------------|-----------------------------------------------------------------------------------------------------------------------------------------------------------------------------------------------------------------------------------------------------------------------------------------------------------------------------------------------------------------------------------------------------------------------------------------------------------------------------------------------------------------------------------------------------------------------|
| 1  | Central (High IC & Hi IA)  | <p>High IC</p> <ul style="list-style-type: none"><li>• Contain information on past vaccine usage effectiveness (e.g., how vaccine prevent polio, measles).</li><li>• Contain information on how vaccine work</li><li>• Contain on information status in the perspective of Islam</li></ul> <p>High IA</p> <p>The information provided is accurate and it is based on the information provided by Malaysia Ministry of Health (MoH) and can be accessed through the official website <a href="https://www.vaksincovid.gov.my/">https://www.vaksincovid.gov.my/</a></p> |
| 2  | Central (High IC & Low IA) | <p>High IC – maintain all three information</p> <p>Low IA – some of the statement if completely inaccurate but the statement is ensured to not mislead the respondent</p>                                                                                                                                                                                                                                                                                                                                                                                             |
| 3  | Central (Low IC & High IA) | <p>Low IC – some of the information is omitted (no info on past vaccine effectiveness and vaccine working mechanism)</p>                                                                                                                                                                                                                                                                                                                                                                                                                                              |

|                                              |                                |                                                                                                                                                |
|----------------------------------------------|--------------------------------|------------------------------------------------------------------------------------------------------------------------------------------------|
| <hr/>                                        |                                |                                                                                                                                                |
| High IA – the retain information is accurate |                                |                                                                                                                                                |
| <hr/>                                        |                                |                                                                                                                                                |
| 4                                            | Central (Low IC & Low IA)      | Low IC – some of the information is omitted (no info on past vaccine effectiveness and vaccine information status in the perspective of Islam) |
|                                              |                                | Low IA – some of the statement if completely inaccurate but the statement is ensured to not mislead the respondent                             |
| <hr/>                                        |                                |                                                                                                                                                |
| 5                                            | Peripheral (High ES & High SP) | High ES – Include firsthand experience with the COVID-19 vaccine. And include story telling technique in conveying the message.                |
|                                              |                                | High SP - contain message on prosocial responsibility of an individual towards his or her immediate family (e.g., parents, spouses, children)  |
|                                              |                                | Contain Verified profile, High RT, and Picture to get vaccinated                                                                               |
| <hr/>                                        |                                |                                                                                                                                                |
| 6                                            | Peripheral (High ES & Low SP)  | High ES – Include firsthand experience with the COVID-19 vaccine. And include story telling technique in conveying the message.                |
|                                              |                                | Low SP – does not contain message on prosocial responsibility                                                                                  |
|                                              |                                | Contain common profile and no RT and No picture                                                                                                |
| <hr/>                                        |                                |                                                                                                                                                |

|   |                               |                                                                                                                                                                                                                                                                                                                                          |
|---|-------------------------------|------------------------------------------------------------------------------------------------------------------------------------------------------------------------------------------------------------------------------------------------------------------------------------------------------------------------------------------|
| 7 | Peripheral (Low ES & High SP) | <p>Low ES – Does not contain firsthand experience with the COVID-19 vaccine. No story telling technique</p> <p>High SP - contain message on prosocial responsibility of an individual towards his or her immediate family (e.g., parents, spouses, children)</p> <p>Contain Verified profile, High RT, and Picture to get vaccinated</p> |
| 8 | Peripheral (Low ES & Low SP)  | <p>Low ES – Does not contain firsthand experience with the COVID-19 vaccine. No story telling technique</p> <p>Low SP – does not contain message on prosocial responsibility</p>                                                                                                                                                         |
